# Supplementary material
Source: PubMed Central journal article supplement (PMC6288794)
Supplement: NIHMS996875-supplement-1.pdf [file NIHMS996875-supplement-1.pdf]

Supplementary Table 1. Primers used for PCR and Sequencing

|              | <b>Forward<br/>(alternative)</b>                        | <b>Reverse<br/>(alternative)</b>                       | <b>Tm(°<br/>C)</b> |
|--------------|---------------------------------------------------------|--------------------------------------------------------|--------------------|
| CDKN1A CDS 1 | CTTGTATCTCTGCTGCAGGC**                                  | CGTGCACATGTCCGCACCT**                                  | 56                 |
| CDKN1A CDS 2 | AGTGGACGTTCCCCGAGTTCT**                                 | GGGGGCGGCCAGGGTATGT**                                  | 56                 |
| CDKN1C CDS 1 | ctgccgtccggacgagacagggcgaac*<br>(CCTCTCCTCCTCTCCTTTC)   | cacctgcaccgtctcgcggtagaac*<br>(CACCGTCTCGCGGTAGAAC)    | 58                 |
| CDKN1C CDS 2 | caaggggaaatgcttacacagcacattg*<br>cattcccaccaggatattcg*  | ctcggggctctttgggctctaaactg*                            | &<br>(68)          |
| CDKN2A/ARF   | (TAGCCTGGGCTAGAGACGAA)                                  | ggtcccagctcgcagttaag*                                  | 56<br>(58)         |
| CDKN2A CDS 1 | caatttggcagttaggaaggttgc*<br>(accggaggaagaagaggag)      | caaacccttctgaaaactcccaggaag*<br>(agaatcgaagcgctacctga) | 56                 |
| CDKN2A CDS2  | gtgtactgaagaatggatagagaactc*<br>(TGGAAGCTCTCAGGGTACAAA) | agggagactcaggcgtcccaccgattg*<br>(CCTGGCTCTGACCATTCTGT) | 56                 |
| CDKN2A CDS 3 | gcgggtacatgcacgtgaagccattg*<br>(TACATGCACGTGAAGCCATT)   | gtgagtgtcactccagaaaactccaac*<br>(CAGTTGTGGCCCTGTAGGA)  | 56                 |
| CDKN2B CDS 1 | gcgggtacatgcacgtgaagccattg                              | cgcgtggaatgcacacctccggccaac                            | 55                 |
| CDKN2B CDS 2 | cagcaaatgaagaacaccagacatc                               | ctctcctcctgtgagtctcagacag                              | 55                 |
| CDKN2C CDS 1 | cagcctggttaggagcaaaag                                   | tagaaacccgggtcacgtag                                   | 55                 |
|              |                                                         |                                                        |                    |
| CDKN2C CDS 2 | tctccgaagaactccatc                                      | cattaaaagtccagagagctactcag                             | 55                 |
| CDKN2D CDS 1 | gtttcacgcccagcccgaagttc*                                | ggtcaccaccagggccaggagac*                               | & (65)             |
| CDKN 2D CDS2 | ctagcatttctgtttctgggagatgc<br>(cttccagtgacccttttg)      | Caacacctataagccaaaactgtg<br>(tgtttctcccctctctctga)     | 56<br>(58)         |

\* (Agarwal *et al.* 2009)

\*\* (McKenzie *et al.* 1997)

& GC-rich region protocol: CG-rich region PCR were performed with Advantage-GC 2 PCR kit (Invitrogen; Grand Island, NY) following vendor's protocol with the modification of the annealing temperature from 65 °C to 68°C

Supplementary Table 2. Primers used for Site-Directed Mutagenesis

| <b>Missense Variant</b> | <b>Forward primer</b>            | <b>Reverse primer</b>           |
|-------------------------|----------------------------------|---------------------------------|
| P15-D86N                | acccgaccgggtgcatAatgctgcccgggagg | cctcccgggcagcatTatgcaccggtcgggt |
| P18-L21H                | ggacctagagcaacAtactagtttgttc     | gcaacaaactagtaTgttgctctaggcc    |
| P18-T165I               | gctgggggagccaTaaatctcaataaacgt   | acgtttattgaagatttAtggctccccagc  |
| P21-R9H                 | accggctggggatgtccAtcagaacccatgc  | gcatgggttctgaTggacatccccagccgg  |
| P21-C117Y               | acctgtcactgtcttAtacccttgtgcctcg  | cgaggcacaagggaTaagacagtgacaggt  |

Agarwal, S. K., C. M. Mateo, et al. (2009). "Rare germline mutations in cyclin-dependent kinase inhibitor genes in multiple endocrine neoplasia type 1 and related states." J Clin Endocrinol Metab **94**(5): 1826-1834.

McKenzie, K. E., A. Siva, et al. (1997). "Altered WAF1 genes do not play a role in abnormal cell cycle regulation in breast cancers lacking p53 mutations." Clin Cancer Res **3**(9): 1669-1673.
